# Supplementary material for: Tribocorrosion Susceptibility and Mechanical Characteristics of As-Received and Long-Term In-Vivo Aged Nickel-Titanium and Stainless-Steel Archwires
Source: MDPI journal article supplement (doi:10.3390/ma15041427), 2022-02-15
Supplement: s1 [file s1]

## Supplementary materials

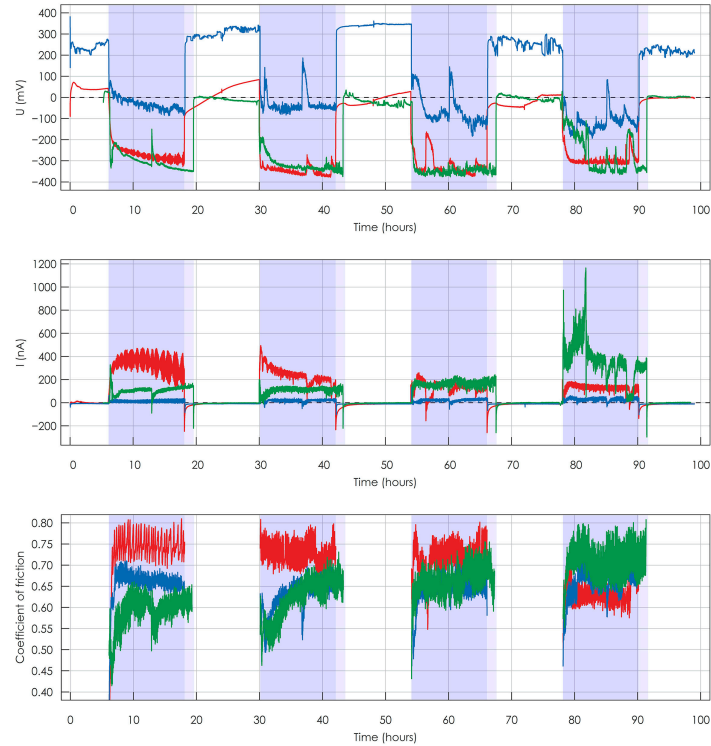

**Figure S1.** Electrochemical potential (U), current (I), and coefficient of friction measured on three (red, blue, green) as-received NiTi archwires (highlighted sections represent intervals where the specimen was exposed to tribocorrosion cycles).

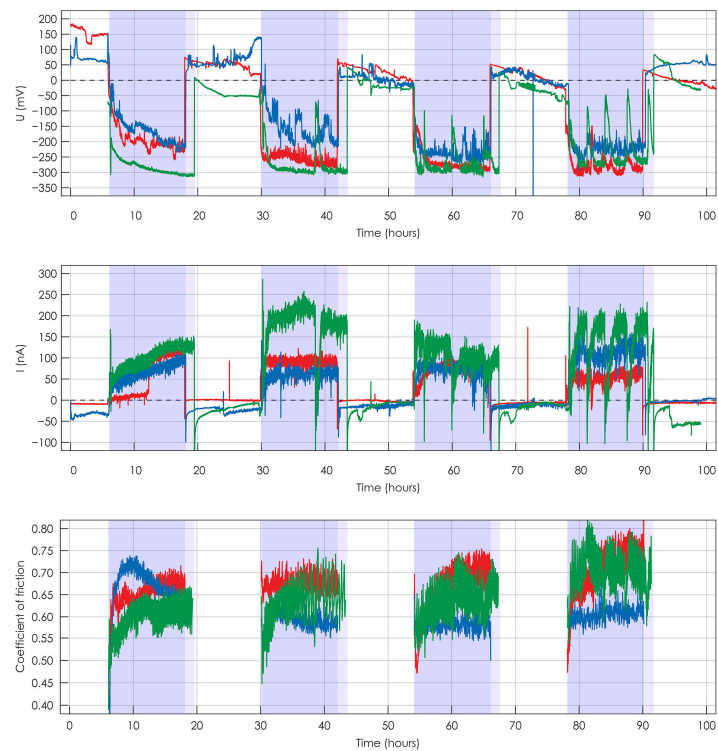

**Figure S2.** Electrochemical potential (U), current (I), and coefficient of friction measured on three (red, blue, green) in-vivo aged NiTi archwires (highlighted sections represent intervals where the specimen was exposed to tribocorrosion cycles).

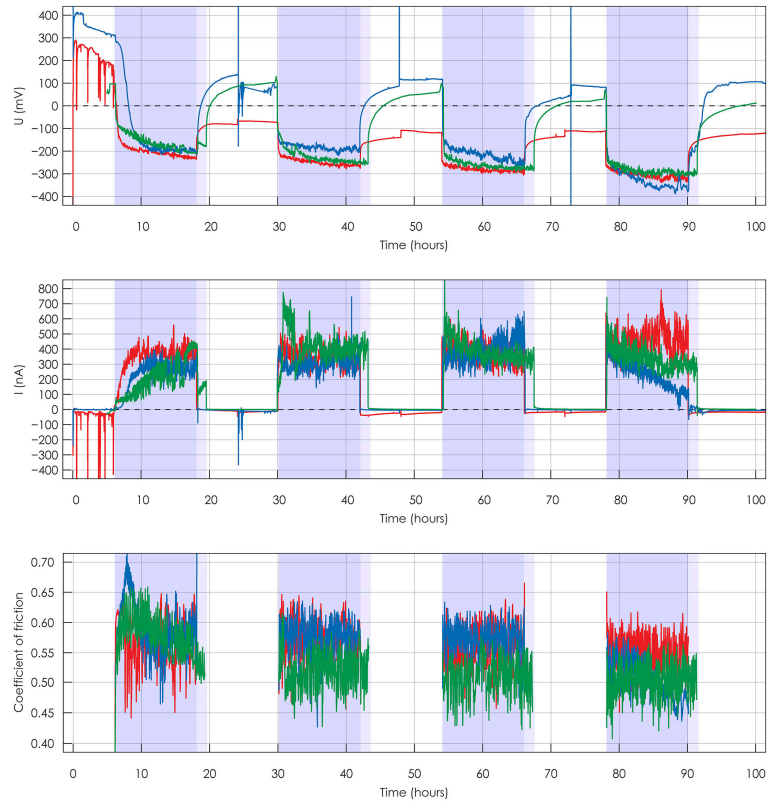

**Figure S3.** Electrochemical potential (U), current (I), and coefficient of friction measured on three (red, blue, green) as-received SS archwires (highlighted sections represent intervals where the specimen was exposed to tribocorrosion cycles).

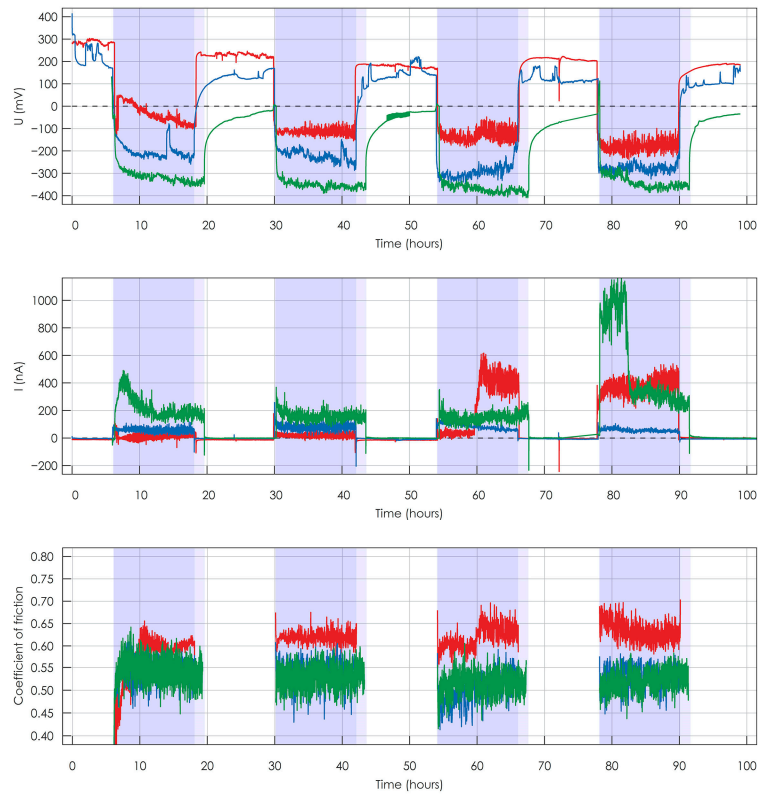

**Figure S4.** Electrochemical potential (U), current (I), and coefficient of friction measured on three (red, blue, green) in-vivo aged SS archwires (highlighted sections represent intervals where the specimen was exposed to tribocorrosion cycles).

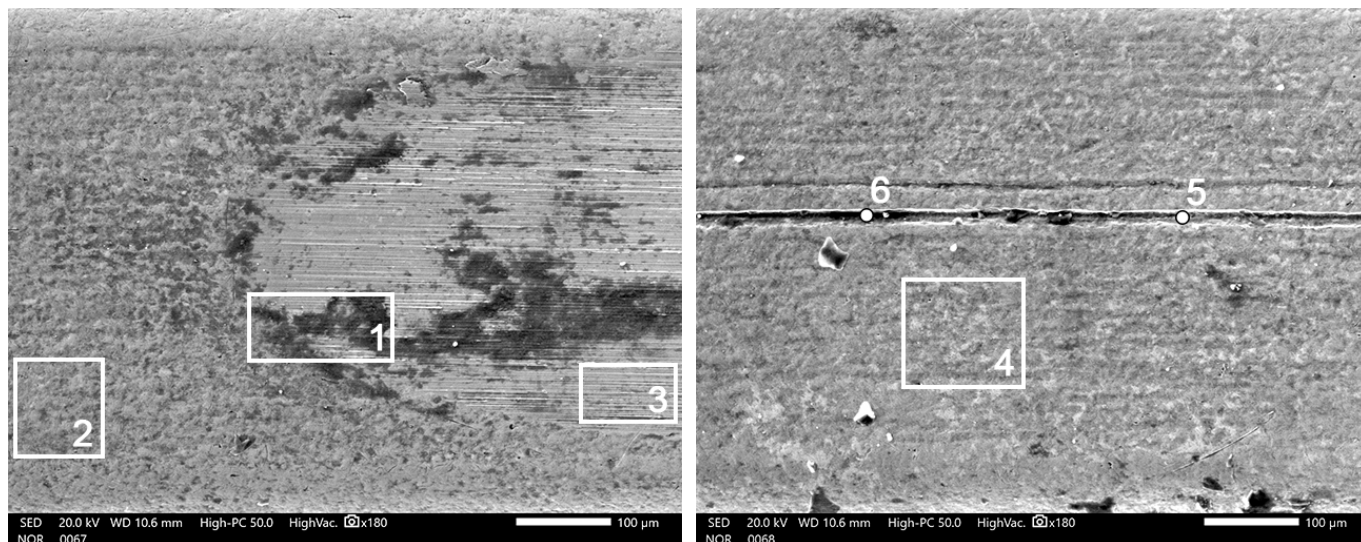

**Figure S5.** Working electrode surface (left) and counter electrode surface (right) both obtained from an as-received NiTi archwire with labeled areas of EDS analysis: 1: edge of the wear track, 2: area outside the wear track, 3: area inside the wear track; 4, 5, 6 counter NiTi electrode.

**Table S1.** EDS surface analysis expressed as weight % of specific chemical elements detected at six locations (shown in Figure S5) of an as-received NiTi archwire.

| Location | C     | O     | P    | K    | Ca   | Ti    | Ni    |
|----------|-------|-------|------|------|------|-------|-------|
| 1        | 17.24 | 16.76 | 1.15 | 0.47 | 0.61 | 30.06 | 33.72 |
| 2        | 10.52 | 2.75  | -    | -    | -    | 39.68 | 47.06 |
| 3        | 11.55 | 4.35  | -    | -    | -    | 38.38 | 45.73 |
| 4        | 9.99  | 2.86  | -    | -    | -    | 39.84 | 47.31 |
| 5        | 12.10 | 3.04  | -    | -    | -    | 38.00 | 46.86 |
| 6        | 25.37 | 5.29  | -    | -    | -    | 31.15 | 38.19 |

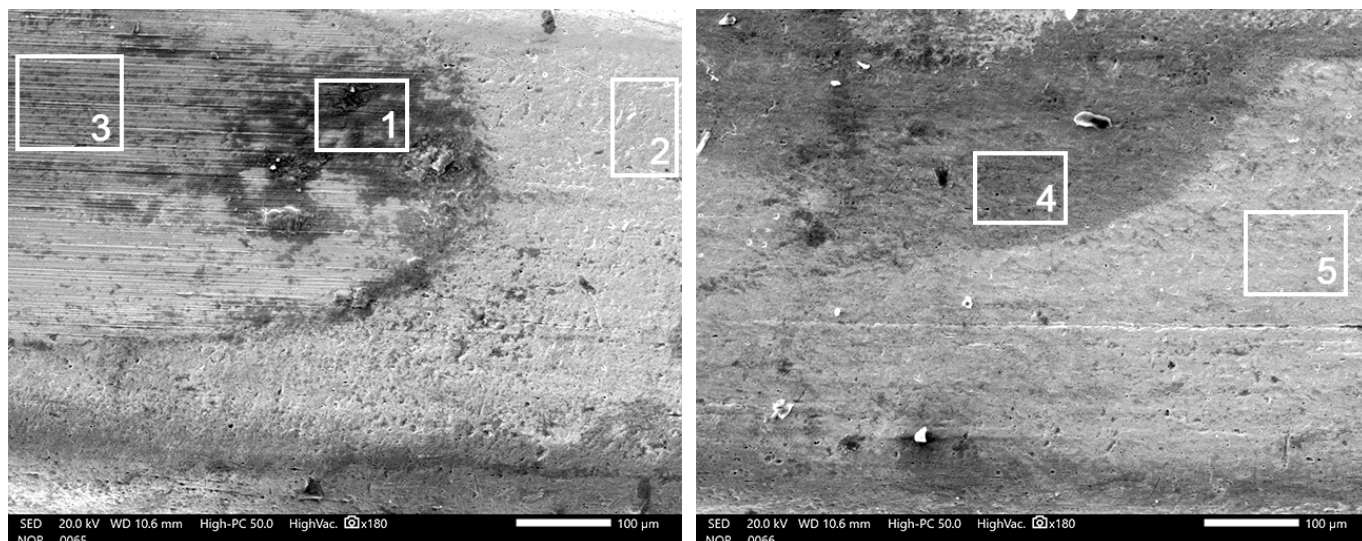

**Figure S6.** Working electrode surface (left) and counter electrode surface (right) both obtained from an in-vivo aged NiTi archwire with labeled areas of EDS analysis: 1: edge of the wear track, 2: area outside the wear track, 3: area inside the wear track; 4, 5 counter NiTi electrode.

**Table S2.** EDS surface analysis expressed as weight % of specific chemical elements detected at six locations (shown in Figure S6) of an in-vivo aged NiTi archwire.

| Location | C     | O     | Na   | Si   | P    | K    | Ca   | Ti    | Ni    | Al   |
|----------|-------|-------|------|------|------|------|------|-------|-------|------|
| 1        | 19.29 | 19.37 | 1.68 | 0.21 | 1.3  | 1.69 | 0.26 | 27.34 | 28.86 | -    |
| 2        | 8.72  | 2.48  | -    | -    | -    | -    | -    | 40.71 | 48.09 | -    |
| 3        | 12.41 | 5.46  | -    | -    | -    | 0.18 | -    | 37.58 | 44.37 | -    |
| 4        | 12.52 | 7.38  | -    | -    | 0.29 | 0.17 | 0.38 | 36.22 | 43.03 | -    |
| 5        | 8.58  | 3.37  | -    | -    | -    | -    | 0.20 | 39.81 | 47.85 | 0.18 |

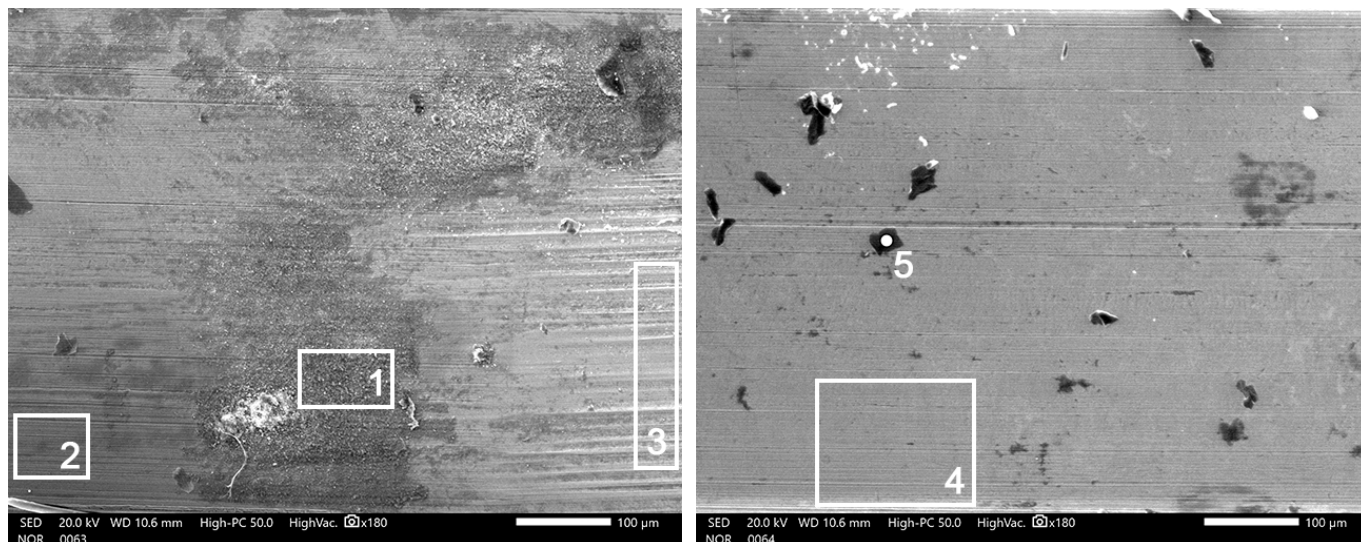

**Figure S7.** Working electrode surface (left) and counter electrode surface (right) both obtained from an as-received SS archwire with labeled areas of EDS analysis: 1: edge of the wear track, 2: area outside the wear track, 3: area inside the wear track; 4, 5 counter SS electrode.

**Table S3.** EDS surface analysis expressed as weight % of specific chemical elements detected at six locations (shown in Figure S7) of an as-received SS archwire.

| Location | C     | O     | Na   | Al   | Si   | P    | S    | Cl   | K    | Ca   | Cr    | Mn   | Fe    | Ni   |
|----------|-------|-------|------|------|------|------|------|------|------|------|-------|------|-------|------|
| 1        | 15.19 | 24.55 | 4.31 | 0.13 | 0.31 | 5.57 | 0.13 | 0.90 | 4.41 | 1.12 | 8.49  | 0.60 | 31.37 | 2.92 |
| 2        | 9.57  | 4.27  | 1.00 | 0.30 | 0.61 | 0.62 | -    | 0.12 | 0.25 | 0.16 | 16.48 | 1.07 | 58.31 | 7.24 |
| 3        | 9.61  | 2.93  | 0.80 | 0.33 | 0.61 | 0.35 | -    | -    | 0.23 | -    | 17.1  | 1.06 | 59.66 | 7.31 |
| 4        | 9.75  | 1.66  | -    | 0.61 | 0.70 | -    | -    | -    | -    | -    | 17.29 | 1.23 | 61.21 | 7.55 |
| 5        | 42.60 | 4.72  | -    | 0.21 | 0.35 | -    | 0.09 | 0.10 | -    | -    | 10.59 | 0.69 | 36.37 | 4.27 |

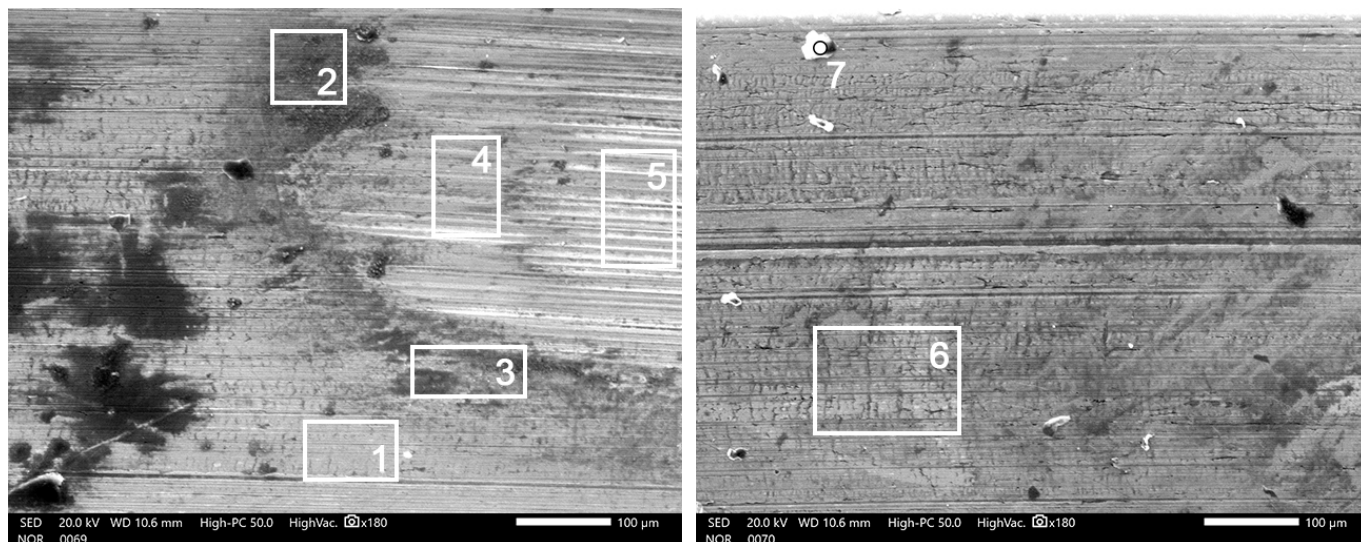

**Figure S8.** Working electrode surface (left) and counter electrode surface (right) both obtained from an in-vivo aged SS archwire with labeled areas of EDS analysis: 1: area outside the wear track; 2,3: edge of the wear track; 4,5: area inside the wear track; 6, 7 counter SS electrode.

**Table S4.** EDS surface analysis expressed as weight % of specific chemical elements detected at six locations (shown in Figure S8) of an in-vivo aged SS archwire.

| Location | C     | O     | Na   | Al   | Si   | P    | S    | Cl   | K    | Ca   | Cr    | Mn   | Fe    | Ni   | Mo   | N    |
|----------|-------|-------|------|------|------|------|------|------|------|------|-------|------|-------|------|------|------|
| 1        | 10.05 | 1.74  | -    | 0.17 | 0.58 | 0.15 | -    | -    | -    | -    | 16.85 | 0.99 | 62.06 | 6.82 | 0.59 | -    |
| 2        | 20.20 | 9.72  | 1.14 | 0.15 | 0.45 | 1.26 | 0.15 | 0.23 | 0.45 | 0.46 | 12.71 | 0.71 | 47.29 | 5.09 | -    | -    |
| 3        | 17.68 | 11.85 | 1.31 | 0.13 | 0.42 | 1.73 | 0.17 | 0.26 | 0.75 | 0.48 | 12.6  | 0.82 | 46.74 | 5.05 | -    | -    |
| 4        | 9.98  | 1.36  | -    | 0.25 | 0.56 | -    | -    | -    | -    | -    | 16.83 | 0.88 | 62.59 | 7.09 | 0.46 | -    |
| 5        | 10.73 | 1.28  | -    | 0.24 | 0.51 | -    | -    | -    | -    | -    | 17.05 | 0.9  | 62.11 | 7.18 | -    | -    |
| 6        | 11.64 | 1.32  | -    | -    | 0.51 | -    | -    | -    | -    | -    | 16.72 | 0.87 | 61.72 | 6.74 | 0.48 | -    |
| 7        | 47.85 | 8.47  | 0.17 | -    | 0.26 | -    | 0.21 | -    | -    | 0.08 | 7.41  | 0.45 | 25.9  | 2.61 | -    | 6.58 |
